# Supplementary material for: Revisiting Avian Metapneumovirus Subtype B in Broiler Chickens and Turkeys in Morocco: First Molecular Characterization
Source: Preprints.org preprint supplement (doi:10.20944/preprints202409.0892.v1), 2024-09-11
Supplement: Supplementary file 1 [file Supplementary Tables S1-S2-S3.docx]

Table S1. North African aMPV/B strains obtained or retrieved from GenBank

| aMPV strain | Country of origin | Year of detection | Species | GenBank Accession number | Reference |
| --- | --- | --- | --- | --- | --- |
| Algeria/26/aMPVB/turkey | Algeria | 2013 | Turkey | KP892758 | Sid et al., 2015 |
| Egypt/Ty/6/13 | Egypt | 2013 | Turkey | KJ196273 | Abdel-Azeem et al., 2014 |
| aMPV/B/chicken/TN1015/17 | Tunisia | 2017 | Chicken | MH411239 | Lachheb et al., 2022 |
| aMPV/B/chicken/TN1000/19 | Tunisia | 2019 | Chicken | MZ229769 | Lachheb et al., 2022 |

Table S2. Mediterranean aMPV/B strains obtained or retrieved from GenBank

| aMPV strain | Country of origin | Year of detection | Species | GenBank Accession number | Reference |
| --- | --- | --- | --- | --- | --- |
| VCO3/60616 | France | 1985 | Turkey | AB548428 | Sugiyama et al., 2010 |
| France 38/86 | France | 1986 | Turkey | - | Naylor et al., 1998 |
| France 147 | France | Before 1994 | Turkey | - | Cecchinato et al., 2010 |
| France/Ck/842-02/17 | France | 2017 | Chicken | OP605527 | Lupini et al., 2022 |
| 102 glycoprotein G (G) gene | Greece | 2017 | Chicken | MG869150 | Andreopoulou et al., 2019 |
| 10aMPV_Chicken_Greece_2016 | Greece | 2016 | Chicken | MF346364 | Tucciarone et al., 2017 |
| Isr/1708/02 | Israel | 2002 | Turkey | AY728268 | Banet-Noach et al. (Kimron Veterinary Institute) |
| IT/Ty/Vr240/87 | Italy | 1987 | Turkey | - | Cecchinato et al., 2010 |
| Italy 16/91 | Italy | 1991 | Turkey | - | Cecchinato et al., 2010 |
| Italy 2119 | Italy | Before 1993 | Turkey | L34031 | Collins et al., 1993  Juhasz & Easton, 1994 |
| IT/Ty/2a/01 | Italy | 2001 | Turkey | - | Catelli et al., 2004 |
| IT/Ck/33a/02 | Italy | 2002 | Chicken | - | Catelli et al., 2004 |
| IT/Ty/129-18/04 | Italy | 2004 | Turkey | - | Catelli et al., 2010 |
| IT/Ck/1348-01/07 | Italy | 2007 | Chicken | - | Cecchinato et al., 2010 |
| IT/Ty/1077-02/09 | Italy | 2009 | Turkey | - | Listorti et al., 2014 |
| IT/Ty/531/10 | Italy | 2010 | Turkey | - | Listorti et al., 2014 |
| IT/Ty/532-01/10 | Italy | 2010 | Turkey | - | Listorti et al., 2014 |
| aMPV/B/Italy/Ty/1997/12 | Italy | 2012 | Turkey | - | Cecchinato et al., 2018 |
| aMPV/B/Italy/Ck/164/13 | Italy | 2013 | Chicken | - | Cecchinato et al., 2018 |
| aMPV/B/Italy/Ty/2009/13 | Italy | 2013 | Turkey | - | Cecchinato et al., 2018 |
| aMPV/B/Italy/Ck/91/14 | Italy | 2014 | Chicken | MF543419 | Tucciarone et al., 2018 |
| aMPV/B/Italy/Ck/376/15 | Italy | 2015 | Chicken | MF543406 | Tucciarone et al., 2018 |
| aMPV/B/Italy/Ck/573-03/15 | Italy | 2015 | Chicken | MN823701 | Tucciarone et al., 2018 |
| aMPV/B/Italy/Ck/541/16 | Italy | 2016 | Chicken | MF543412 | Tucciarone et al., 2018 |
| aMPV/B/Italy/Ty/626-02/16 | Italy | 2016 | Turkey | MT436220 | Mescolini et al., 2021 |
| aMPV/B/Italy/Ty/627-03/16 | Italy | 2016 | Turkey | MT436223 | Mescolini et al., 2021 |
| aMPV/B/Italy/Ty/629-16/16 | Italy | 2016 | Turkey | MT436227 | Mescolini et al., 2021 |
| aMPV/B/Italy/Ty/679/16 | Italy | 2016 | Turkey | MT436228 | Mescolini et al., 2021 |
| aMPV/B/Italy/Ty/1181/19 | Italy | 2016 | Turkey | MT436234 | Mescolini et al., 2021 |
| aMPV/B/Spain/Ck/3372-2/14 | Spain | 2014 | Chicken | MT432826 | Mescolini et al., 2021 |
| aMPV/B/Spain/Ty/11776/14 | Spain | 2014 | Turkey | MT432828 | Mescolini et al., 2021 |
| aMPV/B/Spain/Ck/4892-2/15 | Spain | 2015 | Chicken | MT432834 | Mescolini et al., 2021 |
| aMPV/B/Spain/Ty/4954-1/15 | Spain | 2015 | Turkey | MT432835 | Mescolini et al., 2021 |
| aMPV/B/Spain/Ck/6881/15 | Spain | 2015 | Chicken | MT432837 | Mescolini et al., 2021 |
| aMPV/B/Spain/Ck/652/16 | Spain | 2016 | Chicken | MT432838 | Mescolini et al., 2021 |
| aMPV/B/Spain/Ck/6703/16 | Spain | 2016 | Chicken | MT432842 | Mescolini et al., 2021 |
| aMPV/B/Spain/Ck/12079/16 | Spain | 2016 | Chicken | MT432844 | Mescolini et al., 2021 |
| aMPV/B/Spain/Ck/17248/17 | Spain | 2017 | Chicken | MT432860 | Mescolini et al., 2021 |
| 80_Chicken_Turkey_2018 | Turkey | 2018 | Chicken | MH352462 | Bayraktar et al., 2018 |

Table S3. Other aMPV/B strains obtained or retrieved from GenBank

| aMPV strain | Country of origin | Year of detection | Species | GenBank Accession number | Reference |
| --- | --- | --- | --- | --- | --- |
| Vaccine glycoprotein G | Brazil | 2007 | Chicken | FJ828954 | Villarreal et al., 2009 |
| GB 1407/06 | Germany | 2006 | NA* | JF793659 | Santos, Lueschow, and Hafez (Freie Universität Berlin) |
| Hungary 657/4/89 | Hungary | 1989 | NA* | L34033 | Juhasz & Easton, 1994 |
| Hungary 657/4 complete gene | Hungary | Before 1994 | NA* | MN729604 | Juhasz & Easton, 1994 |
| NL 6726/90 | Netherlands | 1990 | Turkey | - | Cook et al., 1995 |
| aMPV/chicken/Nigeria/NIR89/2006 | Nigeria | 2006 | Chicken | AM490057 | Owoade et al., 2008 |
| aMPV/B/Romania/Ck/1/16 | Romania | 2016 | Chicken | MN823702 | Franzo et al., 2017 |
| aMPV/B/Romania/Ty/30/17 | Romania | 2017 | Turkey | MT432864 | Mescolini et al., 2021 |
| aMPV/B/Romania/Ty/34/17 | Romania | 2017 | Turkey | MT432866 | Mescolini et al., 2021 |
| aMPV/B/Romania/Ty/41/17 | Romania | 2017 | Turkey | MT432870 | Mescolini et al., 2021 |
| N19-29 | South Korea | 2022 | Chicken | OP924007 | Cho et al., 2022 (Konkuk University) |
| CVL14/1 | UK | Before 1994 | Turkey | L34032 | Juhasz & Easton, 1994 |
| UK 11/94 | UK | 1994 | Chicken | - | Cook et al., 1995 |
| Ck.10v1 | Vietnam | 2020 | Chicken | MZ393684 | Nguyen et al., 2021 |
| Pl21 vaccine G gene | Vietnam | 2020 | Chicken | MZ574139 | Nguyen et al., 2021 |
| 1062 vaccine G gene | Vietnam | 2020 | Chicken | MZ574138 | Nguyen et al., 2021 |
| *NA – not available | | | | | |
